# Supplementary material for: Ghrelin-O-Acyltransferase (GOAT) Enzyme as a Novel Potential Biomarker in Gastroenteropancreatic Neuroendocrine Tumors
Source: PubMed Central journal article supplement (PMC6175927; doi:10.1038/s41424-018-0058-8), 2018-10-08

# Supplemental Figure 1

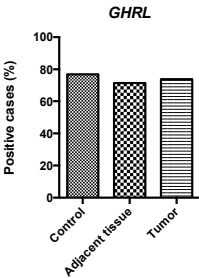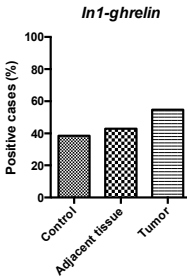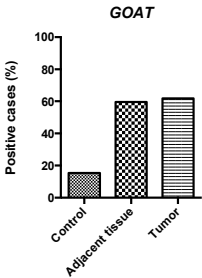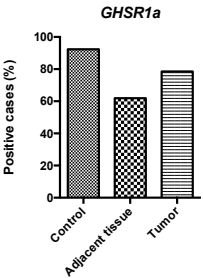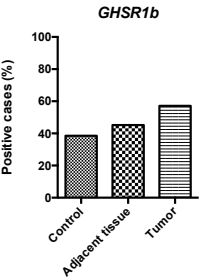

# Supplemental Figure 2

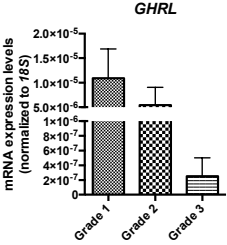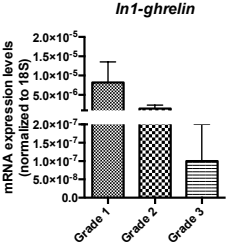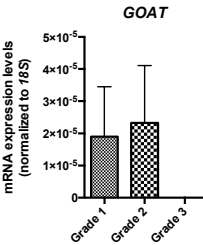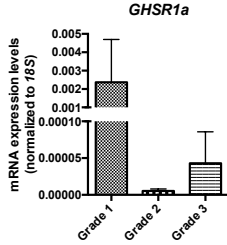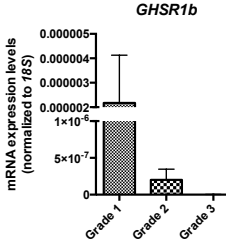

# Supplemental Figure 3

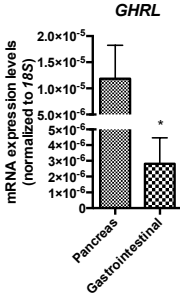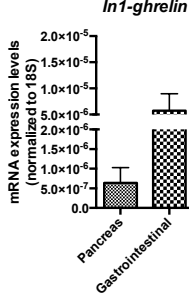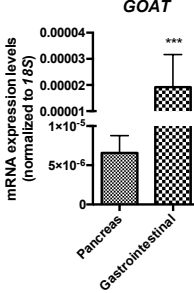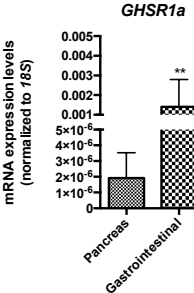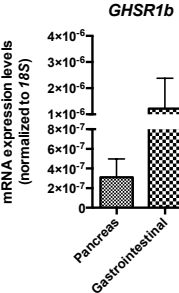

Supplement: 41424_2018_58_MOESM1_ESM.pdf [file 41424_2018_58_MOESM1_ESM.pdf]
